# Supplementary material for: The Impact of Omicron Variant in Vaccine Uptake in South Africa
Source: Research Square preprint supplement (doi:10.21203/rs.3.rs-2454619/v1), 2023-01-18
Supplement: Supplementary file 1 [file aceb9853b2f68c4efb1b5d01.docx]

**Appendix A: Word cloud of most dominant words before and during Omicron**

| 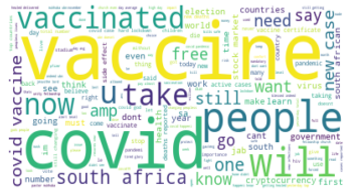 | 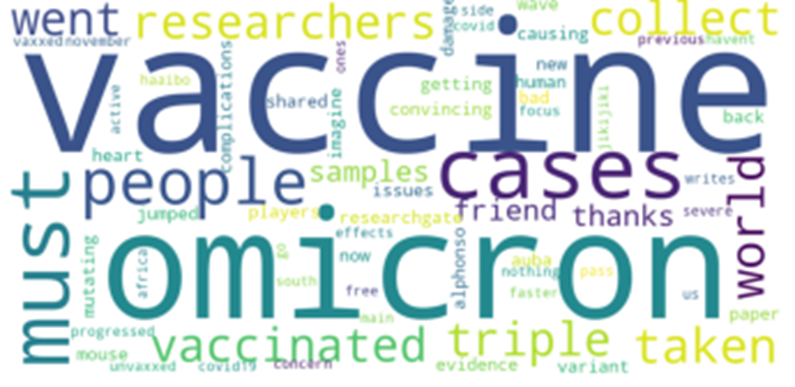 |
| --- | --- |
| (a) Dominant words before Omicron | (b) Dominant words during Omicron |

**Appendix B: Trend in tweets with time before and during Omicron**

| 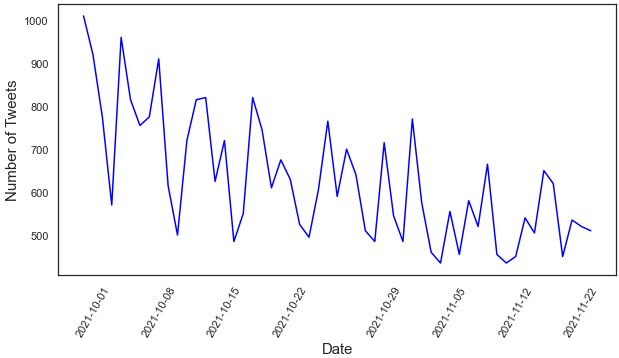 | 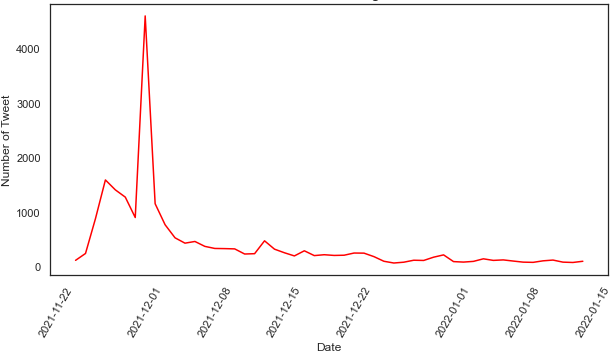 |
| --- | --- |
| (a) Trends in COVID-19 vaccine related tweets before Omicron | (b) Trends in COVID-19 vaccine related tweets during Omicron |
